# Supplementary material for: Thiram inhibits human sperm motility and capacitation by increasing mitochondrial O2- and reducing PTK and PAK4 activity at environmental concentrations
Source: Research Square preprint supplement (doi:10.21203/rs.3.rs-8601243/v1), 2026-02-09
Supplement: Supplementary file 1 [file 838a68c4e79b3efd5984bc42.xlsx]

## Sheet: Sheet1
Table 1. Potency of thiram for various parameters
Parameters IC50 (μM)
Normal spermatozoa
Vitality	>100
Motility	-
Thiram	4.95
Thiram +Forskolin	6.09
Thiram +8Br-cAMP	4.7
Thiram +Pentoxifylline	4.33
Thiram+ Progesterone	5.24
Thiram +Vitamin E	4.3
Thiram +A23187	3.26
Thiram + Washing	4.7
Forward motility	-
Thiram	4.23
Thiram +Forskolin	4.64
Thiram +8Br-cAMP	4.03
Thiram +Pentoxifylline	3.52
Thiram +Progesterone	4.15
Thiram +Vitamin E	3.85
Thiram +A23187	2.97
Thiram + washing	4.16
Hyperactivation	-
VCL	9.92
VSL	5.89
LIN	7.2
ALH	7.44
VAP	5.5
BCF	11.07
Capacitation and spontaneous acrosome reaction Capacitation	4.59
Intracellular parameters H2O2	1.4
O2-	0.9
ROS	0.89
MMP	>100
cAMP	>100
DFI	NA
Tyrosine protein kinase	0.27
P21-activated kinase 4	0.69
NA = no action
